# Supplementary material for: An in vitro testing strategy towards mimicking the inhalation of high aspect ratio nanoparticles
Source: PubMed Central journal article supplement (PMC4189630; doi:10.1186/s12989-014-0040-x), 2014-09-23

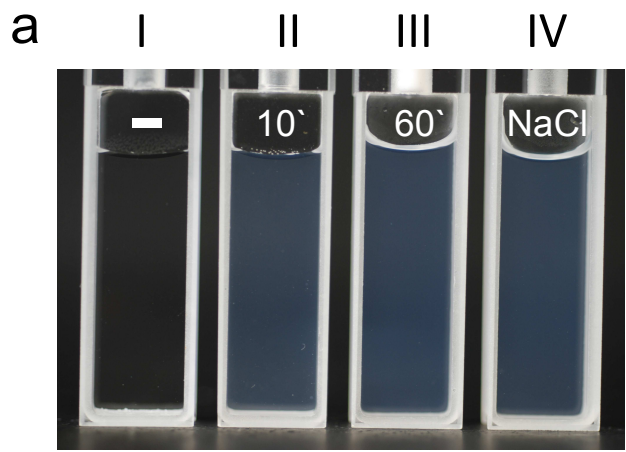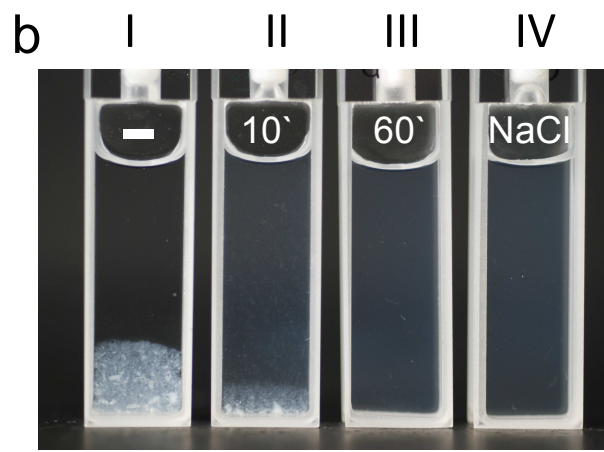

Supplement: 12989_2014_40_MOESM1_ESM.pdf [file 12989_2014_40_MOESM1_ESM.pdf]
